# Supplementary material for: EWET: Data collection and interface for the genetic analysis of Echinococcus multilocularis based on EmsB microsatellite
Source: PubMed Central journal article supplement (PMC5626424; doi:10.1371/journal.pone.0183849), 2017-10-03
Supplement: pone.0183849.s001.pdf [file pone.0183849.s001.pdf]

# **EmsB analysis guidelines**

---

*Guide to using the EmsB tool and for off-line use*

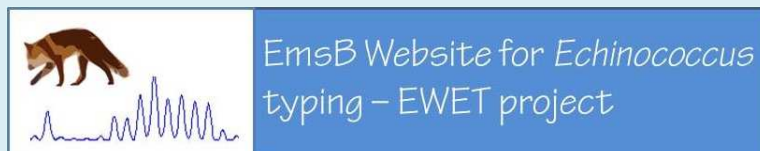

## Summary

|      |                                                                           |   |
|------|---------------------------------------------------------------------------|---|
| I.   | Introduction to the EmsB microsatellite .....                             | 3 |
| II.  | DNA extraction .....                                                      | 3 |
| III. | EmsB Primers.....                                                         | 4 |
| IV.  | Amplification by PCR .....                                                | 4 |
| V.   | Size of polymorphism analysis .....                                       | 4 |
| VI.  | Example of EmsB electrophoregram and interpretation .....                 | 4 |
| 1.   | Recording EmsB data on a spreadsheet .....                                | 5 |
| a)   | EmsB fragment size .....                                                  | 5 |
| b)   | Fluorescence intensity.....                                               | 5 |
| VII. | Euclidean distance calculation, dendrogram and examples for training..... | 6 |



### III. EmsB Primers

Primers were designed in the highly conservative flanking region of the microsatellite (Figure 1). The EmsB A primer is 5'-labeled with a fluorochrome (ex. FAM), and is 20-bp long. The EmsB A primer can be ordered as a "modified" oligonucleotide. The EmsB C, 20-bp long primer can be ordered as an "unmodified" primer.

Table 1. EmsB primers: description and reference.

| Primer name | Primer sequence                 | Size of amplicons | Microsatellite repetition           | Annealing temp (°C) | Genbank Reference |
|-------------|---------------------------------|-------------------|-------------------------------------|---------------------|-------------------|
| EmsB A      | 5'(FAM)-GTGTGGATGAGTGTGCCATC-3' | 209-241 bp        | (CA) <sub>n</sub> (GA) <sub>n</sub> | 60                  | AY680860          |
| EmsB C      | 5'-CCACCTTCCTACTGCAATC-3'       |                   |                                     |                     |                   |

### IV. Amplification by PCR

The EmsB-PCR is performed in a 30 µl reaction mixture containing 50 to 100 ng of DNA, 200 µM of each deoxynucleoside triphosphate, 0.4 µM of fluorescent forward primer, 5-labeled specific fluorescence dye, 0.7 µM of classical reverse primers, and 0.5 U of enzyme, e.g. *Taq* DNA polymerase enzyme associated with the corresponding PCR buffer. The PCR amplification is achieved in a thermocycler under the following conditions: an initial denaturation step at 94°C for 5 min and 30 cycles with denaturation at 94°C for 30 s, annealing 60°C for 30 s, extension at 72°C for 1 min and a final extension step at 72°C for 10 min (minimum). One PCR is enough to obtain an EmsB profile. It is possible (but not essential) to control the size of the PCR products by electrophoresis on 1% agarose gel.

### V. Size polymorphism analysis

PCR products are studied in fragment size analysis. To assess the polymorphism of size, an automatic sequencer can be used, such as ABI Prism 3100 or 3500 automatic sequencer (Life Technologies, Foster City, CA) or Beckman CEQ 8000 (Beckman Coulter, Fullerton, CA). A molecular-weight size marker is used to specify the size of the PCR fragments. The fluorescence signal generated by the labeled primer is detected by colorimetric reading. Correspondences are established to assess the size of the amplified fragments using dedicated software (e.g. Genotyper 3.7 for the ABI apparatus or Genetic Analysis System 8.0.52 for the Beckman apparatus).

### VI. Example of EmsB electrophoregram and interpretation

After the fragment size analysis is performed, an EmsB electrophoregram is obtained (Figure 2). We can observe size standard (1) and a series of peaks (2) with different sizes (from 209 to 241 bp observed in *E. multilocularis* samples from endemic regions worldwide). The height of peaks is different from one peak to another and refer to the number of EmsB fragment copies for a given size. The size and fluorescence intensity for each peak are recorded in a spreadsheet (Table 2).

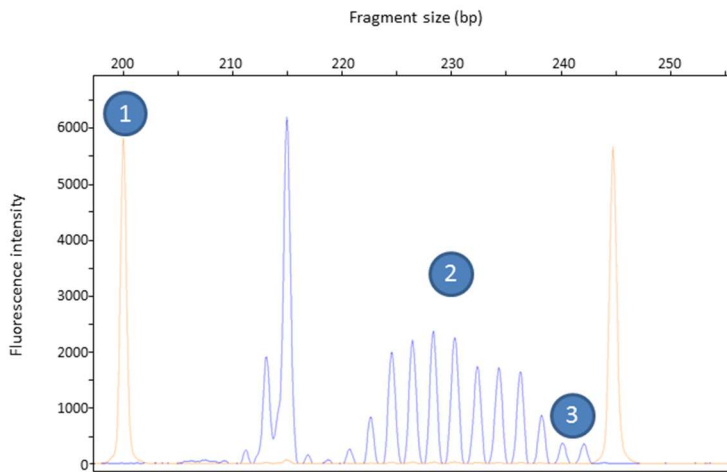

Figure 2. Electrophoregram of EmsB-PCR products performed on a 3100 automatic sequencer (Life Technologies, Foster City, CA). (1): size standard in orange (GS 5000 Gene Scan 500 LYZ), (2): the EmsB fragments classified by size in blue (in base pair) and (3) peaks under 10% of the highest peak to be removed from the analysis.

1. Recording EmsB data on a spreadsheet:

a) EmsB fragment size

On the electrophoregram, the size of the fragments has to be adjusted (see the “raw peak size” and “adjusted peak size” lines in Table 2 - Step 1). Because the EmsB variations are due to the addition or suppression of 2 nucleotides (CA) and (GA), the minimum distance between two peaks is 2 bp.

b) Fluorescence intensity

For each peak, the fluorescence intensity (FI) is recorded (Table 2 – Step 2). This intensity depends on the initial quantity of DNA used for the PCR. First the lowest peak values (under 10% of the highest peak) have to be removed. Second the FI values are thus normalized: for each peak the FI is divided by the sum of the entire FI for a given sample (e.g. for the peak at 215 bp → 6185/21797 = 0.28). The sum of the normalized values is equal to 1. The distance between samples will be calculated according to these normalized values. NB. substitute coma by point. Fragment sizes and normalized FI (Table 2 – Step 3) are saved in a text file in tab format (\*.txt) (Figure 3).

Table 2. Information on an EmsB fragment size analysis to be recorded for genotyping studies

Step 1: Adjust the peak size

|                               |        |        |        |        |        |        |        |        |        |        |        |        |        |        |        |
|-------------------------------|--------|--------|--------|--------|--------|--------|--------|--------|--------|--------|--------|--------|--------|--------|--------|
| Raw peak size (size standard) | 214.99 | 216.92 | 218.75 | 220.78 | 222.72 | 224.56 | 226.51 | 228.45 | 230.41 | 232.46 | 234.42 | 236.39 | 238.35 | 240.38 | 242.32 |
| Adjusted peak size            | 215    | 217    | 219    | 221    | 223    | 225    | 227    | 229    | 231    | 233    | 235    | 237    | 239    | 241    | 243    |

Step 2: Normalize the fluorescence intensity

|                                      |      |     |     |     |       |       |       |       |       |       |       |       |       |     |     |       |
|--------------------------------------|------|-----|-----|-----|-------|-------|-------|-------|-------|-------|-------|-------|-------|-----|-----|-------|
| Adjusted peak size                   | 215  | 217 | 219 | 221 | 223   | 225   | 227   | 229   | 231   | 233   | 235   | 237   | 239   | 241 | 243 |       |
| Original Fluorescence intensity (FI) | 6185 | 0   | 0   | 300 | 831   | 1985  | 2210  | 2368  | 2252  | 1741  | 1716  | 1642  | 867   | 455 | 450 | Sum   |
| FI without peak 10%                  | 6185 | 0   | 0   | 0   | 831   | 1985  | 2210  | 2368  | 2252  | 1741  | 1716  | 1642  | 867   | 0   | 0   | 21797 |
| Normalized FI values                 | 0.28 | 0   | 0   | 0   | 0.038 | 0.091 | 0.101 | 0.108 | 0.103 | 0.079 | 0.078 | 0.075 | 0.039 | 0   | 0   | 1     |

Step 3: Values retained for calculation

|                      |      |     |     |     |       |       |       |       |       |       |       |       |       |
|----------------------|------|-----|-----|-----|-------|-------|-------|-------|-------|-------|-------|-------|-------|
| Adjusted peak size   | 215  | 217 | 219 | 221 | 223   | 225   | 227   | 229   | 231   | 233   | 235   | 237   | 239   |
| Normalized FI values | 0.28 | 0   | 0   | 0   | 0.038 | 0.091 | 0.101 | 0.108 | 0.103 | 0.079 | 0.078 | 0.075 | 0.039 |

|    | 215          | 217               | 219 | 221 | 223 | 225 | 227                | 229                | 231                | 233                | 235               | 237                | 239          | 241 | 260 | 276 | 280 | 282 | 284 | 286 | 288 | 290 | 292 | 294 | 296 | 298 | 300 | 302 | 305 | 307 | 309 |
|----|--------------|-------------------|-----|-----|-----|-----|--------------------|--------------------|--------------------|--------------------|-------------------|--------------------|--------------|-----|-----|-----|-----|-----|-----|-----|-----|-----|-----|-----|-----|-----|-----|-----|-----|-----|-----|
| 1  | h            |                   |     |     |     |     |                    |                    |                    |                    |                   |                    |              |     |     |     |     |     |     |     |     |     |     |     |     |     |     |     |     |     |     |
| 2  | JAVA         | 0.232644532156954 |     |     |     |     | 0.0466101694915254 | 0                  | 0                  | 0.0311121430229858 | 0.104945437659624 | 0.0590898537264918 | 0.0954260506 |     |     |     |     |     |     |     |     |     |     |     |     |     |     |     |     |     |     |
| 3  | R04138_1     | 0                 | 0   | 0   | 0   |     | 0.0306298533218292 | 0.0841242450388266 | 0.0936151855047455 | 0.224331320103538  | 0.190681622088007 |                    |              |     |     |     |     |     |     |     |     |     |     |     |     |     |     |     |     |     |     |
| 4  | R04138_5     | 0                 | 0   | 0   | 0   |     | 0.036144578313253  | 0.0602409638554217 | 0.0903614457831325 | 0.253012048192771  | 0.204819277108434 |                    |              |     |     |     |     |     |     |     |     |     |     |     |     |     |     |     |     |     |     |
| 5  | R04138_7     | 0                 | 0   | 0   | 0   |     | 0.047241297655695  | 0.0865498460809851 | 0.111058489225669  | 0.225195358749704  | 0.199857920909306 |                    |              |     |     |     |     |     |     |     |     |     |     |     |     |     |     |     |     |     |     |
| 6  | R04138_11    | 0                 | 0   | 0   | 0   |     | 0.0228161668839635 | 0.0880052151238592 | 0.116688396349413  | 0.222294654498044  | 0.186440677966102 |                    |              |     |     |     |     |     |     |     |     |     |     |     |     |     |     |     |     |     |     |
| 7  | R04138_12    | 0                 | 0   | 0   | 0   |     | 0.0462724935732648 | 0.0874035989717224 | 0.104113110539846  | 0.239074550128535  | 0.214652956298201 |                    |              |     |     |     |     |     |     |     |     |     |     |     |     |     |     |     |     |     |     |
| 8  | R05147_9     | 0                 | 0   | 0   | 0   |     | 0.0368926994024422 | 0.0928812678617823 | 0.0874253052740972 | 0.26344505066251   | 0.158352818914004 |                    |              |     |     |     |     |     |     |     |     |     |     |     |     |     |     |     |     |     |     |
| 9  | R05147_10    | 0                 | 0   | 0   | 0   |     | 0.0313353456949835 | 0.0704326577547794 | 0.0859565904844042 | 0.228115567054765  | 0.207416990081932 |                    |              |     |     |     |     |     |     |     |     |     |     |     |     |     |     |     |     |     |     |
| 10 | R05149-2     | 0                 | 0   | 0   | 0   |     | 0.0532350532350532 | 0.0941850941850942 | 0.129402129402129  | 0.241605241605242  | 0.153153153153153 |                    |              |     |     |     |     |     |     |     |     |     |     |     |     |     |     |     |     |     |     |
| 11 | R05149_11    | 0                 | 0   | 0   | 0   |     | 0.0372093023255814 | 0.0772093023255814 | 0.111627906976744  | 0.273488372093023  | 0.151627906976744 |                    |              |     |     |     |     |     |     |     |     |     |     |     |     |     |     |     |     |     |     |
| 12 | R05151_1-2-5 | 0                 | 0   | 0   | 0   |     | 0.0262235096813539 | 0.0794328403720079 | 0.0991004726330233 | 0.27656654977893   | 0.14682116176246  |                    |              |     |     |     |     |     |     |     |     |     |     |     |     |     |     |     |     |     |     |

Figure 3. Example of text file containing EmsB peak and normalized fluorescent intensity values.

## VII. Euclidean distance calculation, dendrogram and examples for training

Similarities or differences between isolates is tested by the Euclidean distance calculation. Thanks to Knapp and co-workers (2007), two samples are considered similar if the distance between the two samples is under 0.08.

The relationships between samples are represented by generating dendrograms of distance, using the Unweighted Pair Group Method with Arithmetic mean (UPGMA), which is a simple agglomerative hierarchical clustering method, based on pairwise similarity between units. The algorithm allows us to build a phylogenetic tree reflecting the structure present in a pairwise similarity matrix. Here the tree is considered as a dendrogram, not as a phylogenetic tree, because the homozygosity or heterozygosity origins of the EmsB loci are unknown. For each successive iteration the nearest two clusters are combined into a higher-level cluster. The arithmetic average distance between two isolates is calculated for each cluster constituted.

Because of the UPGMA method, the representation of the relationships between samples could change according to the isolates included in the model.

Three analyses are described here with R scripts:

1. **Generate a distance matrix,**
2. **Generate a dendrogram**
3. **Compare one isolate to the data collection**

For training, download the file "[EmsB\\_text\\_file\\_example.txt](#)" and copy the script on Tinn-R or R-studio (in a new script file) and use R software for analysis.

### 1. Generate a distance matrix

```
### Distance matrix on normalized EmsB profiles

#read the table with EmsB data
bdd2<-read.table("EmsB_text_file_example.txt", header=T, row.names=1)

#to see the first line of the table
head(bdd2)

#calculation of Euclidean distance amongst samples
dist2<-dist(bdd2, method="euclidian")
head(dist2)

#to obtain the distance matrix
as.matrix(dist2)

#save as a text file
write.table(as.matrix(dist2),file="distances_samples.txt", sep="\t", dec=",")
```

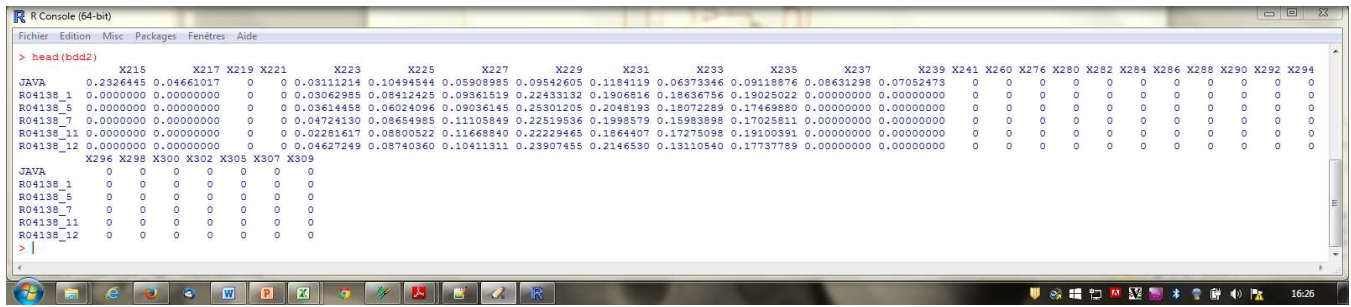

Figure 4. Print screen of the “head (bdd2)” control on R.

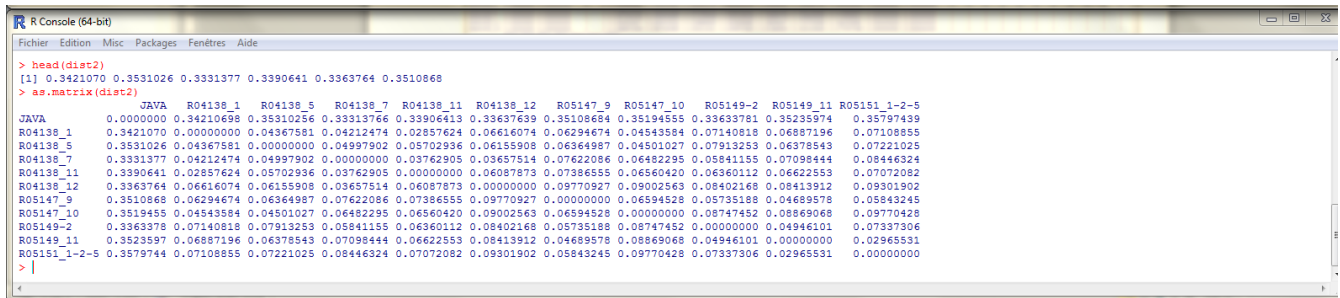

Figure 5. Print screen of the “as.matrix (distance2)” control on R, the distance matrix

## 2. Generate a dendrogram

```
### Dendrogram building on normalized profiles

#read the table with EmsB data
bdd2<-read.table("EmsB_text_file_example.txt", header=T, row.names=1)

#hierarchical clustering analysis with average method
clust2<-hclust(dist2, method="average")

#obtain the dendrogram with Euclidean distance
plot(clust2,cex=0.5, main="ratio somme", hang=-1)

## Test the robustness of the clusters

#load the 'pvclust' package and perform 1000 bootstrap resampling
pv2<-pvclust(t(bdd2), method.hclust="average", method.dist="euclidian", nboot=1000)

#obtain the dendrogram with Euclidean distance
plot(pv2,cex=0.7, main="ratio somme", hang=-1)
```

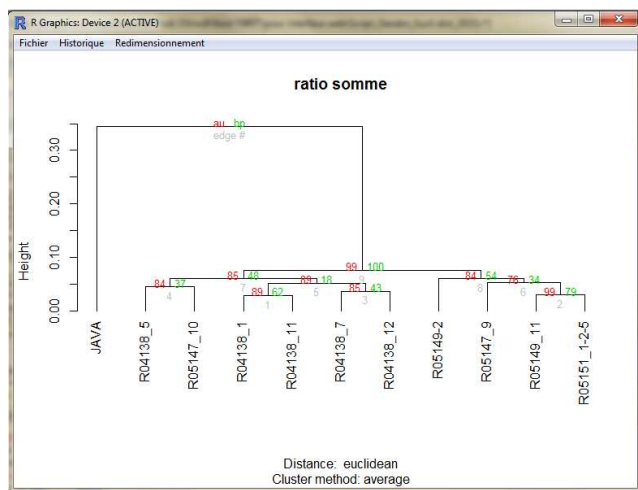

Figure 6. Print screen of the dendrogram generated associated with the bootstrap analysis (pvclust) (au for approx. unbiased value, bp for bootstrap).

## 3. Compare one isolate to the data collection

For training download the files “R05149\_2.txt” and “EmsB\_text\_file\_example.txt”.

```
## Comparison between a single isolate and a data collection

#read the table with EmsB data containing the data collection
bdd2<-read.table("EmsB_text_file_example.txt", header=T)

#read the table with EmsB data containing the single isolate to test
ind.supp<-read.table("R05149_2.txt", header=T)

#to see the first line of the table
head(bdd2)
head(ind.supp)

## Euclidean distance calculation between the tested sample "R05149_2" and the collection samples
"EmsB_text_file_example"

bdd3=bdd2[,-1] #column with sample names removed

#same for " R05149_2"
ind.supp2 <- ind.supp[,-1]
fac <- function(x) {sqrt(sum((ind.supp2[1,]-bdd3[x,])^2))}
dist.eucl <- sapply(1:length(bdd3[,1]),fac)
bdd2$dist.eucl <- dist.eucl
head(bdd2)

#classification of samples according to the distance with the tested samples
tab.order <- bdd2[order(dist.eucl),]

#extraction of table lines where the "dist.eucl" < 0.08
ind.proches <- tab.order[tab.order$dist.eucl<0.08,]
ind.proches[1,1]

#sample names and Euclidean distance for which " dist.eucl " with the tested sample is <0.08
ind.proches[,which(colnames(ind.proches) %in% c("a", "dist.eucl"))]

#to get the top 5 of the samples the most similar to the tested sample
ind.proches[1:5,which(colnames(ind.proches) %in% c("a", "dist.eucl"))]

#find a sample and its dist.eucl with the tested sample for ex. " R05149_11 "
ind.proches[ind.proches$a=="R05149_11",which(colnames(ind.proches) %in% c("a", "dist.eucl"))]
```

---

```
#to get the top 5 of the samples the most similar to the tested sample
```

⇒ **Result:**

```
> ind.proches[1:5,which(colnames(ind.proches) %in% c("a", "dist.eucl"))]
      a dist.eucl
9    R05149_2    0.00000000
10   R05149_11    0.04946101
7    R05147_9    0.05735188
4    R04138_7    0.05841155
5    R04138_11    0.06360112
```

⇒ **Interpretation:** the list of the 5 closest samples to R05149\_2 isolate. All are under 0.08 in distance and are thus considered similar to the tested sample.

---

```
#find a sample and its dist.eucl with the tested sample for ex. " R05149_11 "
```

⇒ **Result:**

```
> ind.proches[ind.proches$a=="R05149_11",which(colnames(ind.proches) %in% c("a", "dist.eucl"))]
      a dist.eucl
10   R05149_11 0.04946101
```

⇒ **Interpretation:** sample R04149\_11 is distant from R04149\_2 with a distance of 0.049. They are considered similar to each other.



## References

1. Valot B, Knapp J, Umhang G, Grenouillet F, Millon L. Genomic characterization of EmsB microsatellite loci in *Echinococcus multilocularis*. *Infect Genet Evol.* 2015;32: 338–341.
2. Bart JM, Knapp J, Gottstein B, El-Garch F, Giraudoux P, Glowatzki ML, et al. EmsB, a tandem repeated multi-loci microsatellite, new tool to investigate the genetic diversity of *Echinococcus multilocularis*. *Infect Genet Evol.* 2006;6: 390–400.
3. Knapp J, Bart JM, Glowatzki ML, Ito A, Gerard S, Maillard S, et al. Assessment of use of microsatellite polymorphism analysis for improving spatial distribution tracking of *Echinococcus multilocularis*. *J Clin Microbiol.* 2007;45: 2943–2950.
4. Knapp J, Guislain M-H, Bart JM, Raoul F, Gottstein B, Giraudoux P, et al. Genetic diversity of *Echinococcus multilocularis* on a local scale. *Infect Genet Evol.* 2008;8: 367–373.
5. Casulli A, Bart JM, Knapp J, La Rosa G, Dusher G, Gottstein B, et al. Multi-locus microsatellite analysis supports the hypothesis of an autochthonous focus of *Echinococcus multilocularis* in northern Italy. *Int J Parasitol.* 2009;39: 837–842.
6. Knapp J, Bart J-M, Giraudoux P, Glowatzki M-L, Breyer I, Raoul F, et al. Genetic diversity of the cestode *Echinococcus multilocularis* in red foxes at a continental scale in Europe. *PLoS Negl Trop Dis.* 2009;3: e452.
7. Knapp J, Staebler S, Bart JM, Stien A, Yoccoz NG, Drögemüller C, et al. *Echinococcus multilocularis* in Svalbard, Norway: microsatellite genotyping to investigate the origin of a highly focal contamination. *Infect Genet Evol.* 2012;12: 1270–1274.
8. Umhang G, Knapp J, Hormaz V, Raoul F, Boué F. Using the genetics of *Echinococcus multilocularis* to trace the history of expansion from an endemic area. *Infect Genet Evol.* 2014;22: 142–149.
